# Supplementary material for: Evaluation of β-Sitosterol Loaded PLGA and PEG-PLA Nanoparticles for Effective Treatment of Breast Cancer: Preparation, Physicochemical Characterization, and Antitumor Activity
Source: PubMed Central journal article supplement (PMC6321471; doi:10.3390/pharmaceutics10040232), 2018-11-15
Supplement: pharmaceutics-10-00232-s001.pdf [file pharmaceutics-10-00232-s001.pdf]

# Supplementary Materials: Evaluation of $\beta$ -Sitosterol Loaded PLGA and PEG-PLA Nanoparticles for Effective Treatment of Breast Cancer: Preparation, Physicochemical Characterization, and Antitumor Activity

Moses Andima, Gabriella Costabile, Lorenz Isert, Albert J. Ndakala, Solomon Derese and Olivia M. Merkel

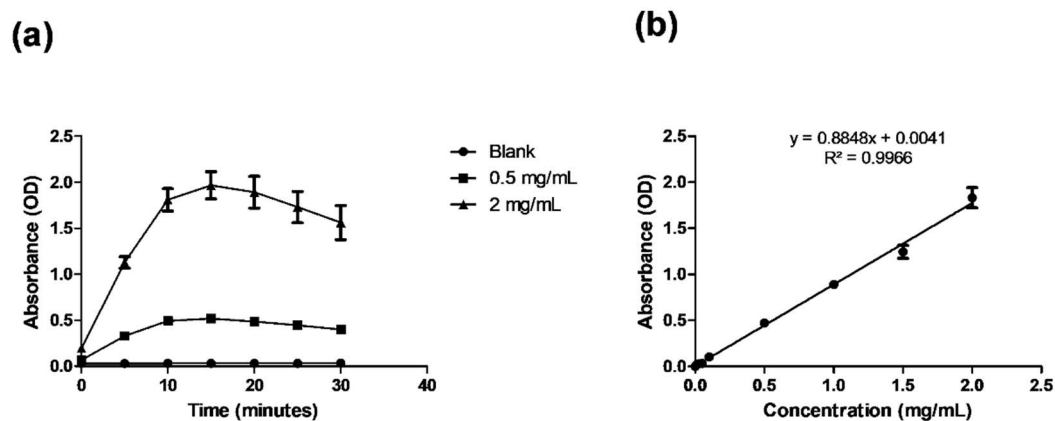

**Figure S1.** Time course for calorimetric reaction of  $\beta$ -sitosterol with Liebermann-Burchard reagent.

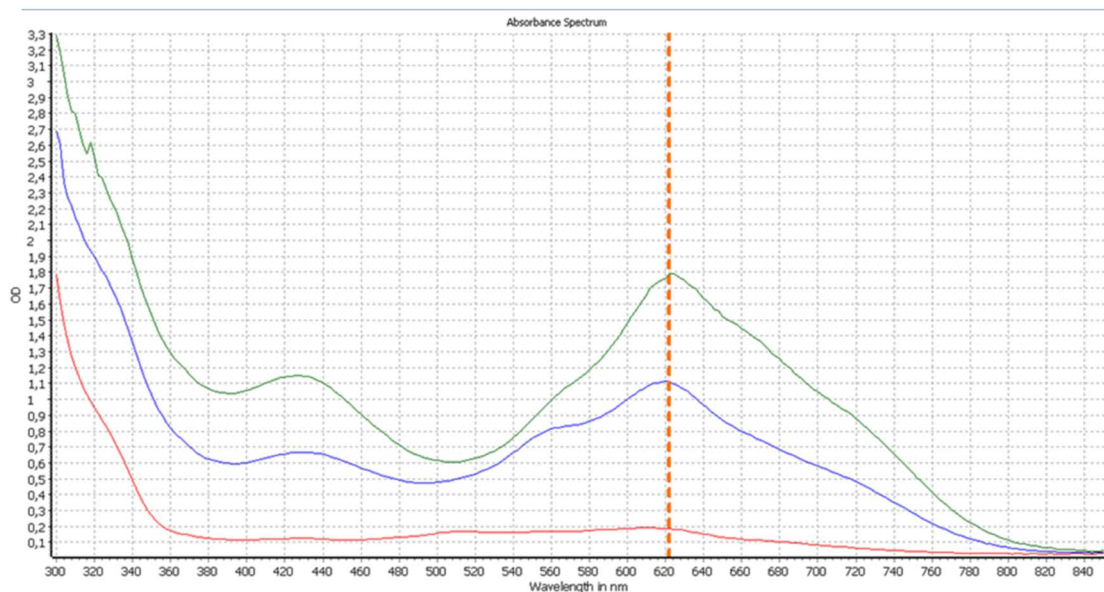

**Figure S2.** UV-Vis spectrum for calorimetric reaction of  $\beta$ -sitosterol with Liebermann-Burchard reagent.

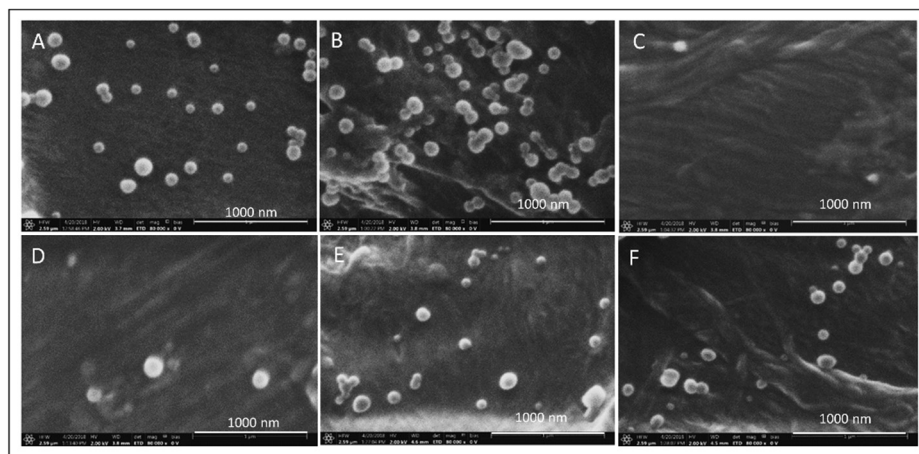

**Figure S3.** Surface morphology of nanoparticles after incubation in PBS and PBS/FBS.

**Table S1** Method precision characterized by intra-assay and inter-assay precision.

| Concentration mg/mL            | Intra-Assay Precision |       |       |       |       | Inter-Assay Precision |       |       |       |        |
|--------------------------------|-----------------------|-------|-------|-------|-------|-----------------------|-------|-------|-------|--------|
|                                | 1                     | 0.25  | 0.1   | 0.5   | 0.05  | 1                     | 0.25  | 0.1   | 0.05  | 0.0125 |
| Absorbance for three runs (OD) | 1.016                 | 0.329 | 0.136 | 0.475 | 0.081 | 1.025                 | 0.313 | 0.148 | 0.081 | 0.04   |
|                                | 1.001                 | 0.335 | 0.139 | 0.493 | 0.082 | 1.028                 | 0.304 | 0.146 | 0.082 | 0.038  |
|                                | 0.994                 | 0.333 | 0.131 | 0.469 | 0.083 | 0.987                 | 0.306 | 0.143 | 0.083 | 0.039  |
| Mean Abs at 622 nm             | 1.004                 | 0.332 | 0.135 | 0.479 | 0.082 | 1.013                 | 0.308 | 0.146 | 0.082 | 0.039  |
| St.Dev                         | 0.011                 | 0.003 | 0.004 | 0.012 | 0.001 | 0.023                 | 0.005 | 0.003 | 0.001 | 0.001  |
| % RSD                          | 1.120                 | 0.919 | 2.986 | 2.608 | 1.220 | 2.255                 | 1.536 | 1.728 | 1.220 | 2.564  |

For intra-assay precision, samples were run in triplicate at five different concentration levels on the same day. For inter-assay precision samples were run at five different concentration levels on three different days, each in triplicate for each day. Precision is indicated by the %RSD with an acceptance of  $\pm 2$  %RSD.

**Table S2.** Spike recovery for determination of Liebermann-Burchard method for determination of  $\beta$ -Sit.

| Spiked Quantity (mg) | Recovered Quantity (mg) | Spike Recovery (%) |
|----------------------|-------------------------|--------------------|
| 0                    | 0                       | 0                  |
| 0.4                  | 0.3818                  | 95.45              |
| 0.8                  | 0.7767                  | 97.0               |
| 1.5                  | 1.554                   | 103.60             |

Spike recovery was determined by standard addition method. Here, to 0.5 mL of stock nanoparticle suspension of  $\beta$ -Sit was added 1 mL of standard solution of  $\beta$ -Sit at three concentration levels; that is 0.4, 0.8 and 1.5 mg/mL. The spiked samples were extracted by shaking with DCM for 30 minutes. Absorbance of the recovered sample was measured using a microplate reader. Amount of  $\beta$ -Sit in the recovered sample was determined from the standard curve.

Recovery was determined using the equation below with acceptance level of  $\pm 5\%$

$$Recovery = \frac{[\beta - Sit \text{ in spiked sample}] - [\beta - Sit \text{ in unspiked sample}]}{[Spiked sample]} \times 100$$

Where [ ] = concentration.

**Table S3** Physicochemical properties of blank nanoparticles.

| Formulation Parameter                   | Sonication Amplitude (%) | Formulation Code   | Physico-Chemical Properties |              |                    |
|-----------------------------------------|--------------------------|--------------------|-----------------------------|--------------|--------------------|
|                                         |                          |                    | Z-Average (nm)              | PDI          | Zeta Potential(mV) |
| Effect of organic solvent               | 20                       | A1 (DCM)           | 335.7 ± 134.2               | 0.28 ± 0.02  | -9.84 ± 6023       |
|                                         | 25                       | A2 (DCM)           | 260.5 ± 62.81               | 0.072 ± 0.01 | -10.3 ± 6.40       |
|                                         | 30                       | A3 (DCM)           | 216.0 ± 96.83               | 0.138 ± 0.01 | -10.6 ± 6084       |
|                                         | 20                       | A4 (Acetone)       | 242.8 ± 55.87               | 0.004 ± 0.01 | -13.7 ± 7.97       |
|                                         | 25                       | A5 (Acetone)       | 221.9 ± 50.31               | 0.094 ± 0.02 | -10.0 ± 5.54       |
|                                         | 30                       | A6 (Acetone)       | 230.0 ± 75.53               | 0.129 ± 0.03 | -10.3 ± 6.40       |
|                                         | 20                       | A7 (Ethyl acetate) | 182.0 ± 61.93               | 0.084 ± 0.01 | -7.97 ± 5.05       |
|                                         | 25                       | A8 (Ethyl acetate) | 173.5 ± 60.97               | 0.094 ± 0.02 | 10.1 ± 5.54        |
|                                         | 30                       | A9 (Ethyl acetate) | 197.6 ± 69.28               | 0.129 ± 0.04 | 10.3 ± 6.40        |
| Polymer concentration                   | 20                       | B1 (5 mg/mL)       | 256.6 ± 103.9               | 0.183 ± 0.01 | -14.3 ± 7.48       |
|                                         | 25                       | B2 (5 mg/mL)       | 273.2 ± 90.52               | 0.254 ± 0.05 | -12.7 ± 3.68       |
|                                         | 30                       | B3 (5 mg/mL)       | 274.6 ± 121.0               | 0.143 ± 0.01 | -13.7 ± 8.01       |
|                                         | 20                       | B4 (10 mg/mL)      | 212.6 ± 13.71               | 0.146 ± 0.01 | -10.55 ± 0.29      |
|                                         | 25                       | B5 (10 mg/mL)      | 210.7 ± 5.43                | 0.116 ± 0.02 | -10.75 ± 1.07      |
|                                         | 30                       | B6 (10 mg/mL)      | 216.2 ± 5.40                | 0.156 ± 0.01 | -9.33 ± 0.50       |
|                                         | 20                       | B7 (15 mg/mL)      | 211.4 ± 13.27               | 0.148 ± 0.01 | -11.27 ± 0.35      |
|                                         | 25                       | B8 (15 mg/mL)      | 205.9 ± 4.81                | 0.135 ± 0.01 | -10.82 ± 0.33      |
|                                         | 30                       | B9 (15 mg/mL)      | 206.4 ± 9.29                | 0.175 ± 0.02 | -10.19 ± 0.11      |
|                                         | 20                       | B10 (20 mg/mL)     | 194.2 ± 0.21                | 0.044 ± 0.02 | -13.15 ± 3.18      |
|                                         | 25                       | B11 (20 mg/mL)     | 202.1 ± 9.83                | 0.118 ± 0.01 | 14.00 ± 1.13       |
|                                         | 30                       | B12 (20 mg/mL)     | 184.7 ± 0.57                | 0.067 ± 0.01 | 14.45 ± 1.48       |
| PVA concentration (% w/v)               | 20                       | C1 (1 % w/v)       | 219.6 ± 16.54               | 0.06 ± 0.01  | -14.6 ± 0.49       |
|                                         | 20                       | C2 (2 % w/v)       | 175.5 ± 46.84               | 0.042 ± 0.01 | -15.0 ± 6.38       |
| Aqueous/Org phase ratio                 | 20                       | D1 (2:1, vol:vol)  | 321.0 ± 69.85               | 0.093 ± 0.04 | -8.31 ± 6.81       |
|                                         | 20                       | D2 (5:1, vol:vol)  | 219.5 ± 51.70               | 0.064 ± 0.01 | -14.3 ± 7.98       |
| Duration of solvent evaporation (Hours) | 20                       | E1 (4 hours)       | 233.5 ± 3.32                | 0.045 ± 0.01 | -12.8 ± 6.42       |
|                                         | 25                       | E2 (4 hours)       | 217.8 ± 0.99                | 0.107 ± 0.01 | -14.3 ± 7.48       |
|                                         | 30                       | E3 (4 hours)       | 207.2 ± 5.37                | 0.135 ± 0.02 | -13.7 ± 8.01       |
|                                         | 20                       | E4 (15 hours)      | 178.8 ± 4.60                | 0.137 ± 0.01 | -11.5 ± 5.00       |
|                                         | 25                       | E5 (15 hours)      | 175.2 ± 2.33                | 0.042 ± 0.01 | -12.7 ± 3.68       |
|                                         | 30                       | E6 (15 hours)      | 178.1 ± 2.12                | 0.127 ± 0.01 | -12.5 ± 3.11       |

The effect of different nanoparticle formulation parameters were investigated one at a time by keeping other factors constant and varying one factor along with sonication amplitude. Results are presented as Mean ± SD,  $n = 3$ .

**Table S4.** Physicochemical parameters of stigmaterol-loaded PLGA and PEG-PLA nanoparticles.

| Polymer Type  | Feeding Drug Concentration (mg/mL) | Physicochemical Parameters |              |                     |                        |              |
|---------------|------------------------------------|----------------------------|--------------|---------------------|------------------------|--------------|
|               |                                    | Particle size (nm)         | PDI          | Zeta Potential (mV) | Loading Efficiency (%) |              |
|               |                                    |                            |              |                     | Method A               | Method B     |
| PLGA          | 1                                  | 200.1 ± 87.20              | 0.134 ± 0.01 | -8.61 ± 5.04        | 34.05 ± 0.44           | 83.17 ± 1.17 |
|               | 2                                  | 206.0 ± 68.70              | 0.111 ± 0.02 | -8.17 ± 6.27        | 51.95 ± 8.70           | 77.38 ± 3.68 |
|               | 4                                  | 218.7 ± 83.40              | 0.114 ± 0.02 | -8.98 ± 4.72        | 72.21 ± 3.83           | 95.95 ± 0.01 |
|               | 8                                  | 231.8 ± 89.51              | 0.107 ± 0.02 | -8.39 ± 4.96        | ND                     | ND           |
| PEG-PLA (R25) | 1                                  | 240.3 ± 102.2              | 0.182 ± 0.01 | -24.6 ± 4.48        | 64.84 ± 1.46           | 81.91 ± 2.94 |
|               | 2                                  | 245.3 ± 84.85              | 0.09 ± 0.01  | -19.6 ± 6.48        | 51.74 ± 0.07           | 83.99 ±      |
|               | 4                                  | 245.0 ± 77.63              | 0.075 ± 0.01 | -23.7 ± 9.48        | 57.90 ± 0.024          | 82.07 ± 4.95 |
|               | 8                                  | 266.2 ± 72.89              | 0.058 ± 0.01 | -20.6 ± 8.79        | ND                     | ND           |

Effect of varying feeding drug concentration on particle size, size distribution, zeta potential and drug loading efficiency were investigated. Concentration of polymer used was fixed at 20 mg/mL, Ethyl acetate was used for PLGA nanoparticle formulation while acetone was used for PEG-PLA nanoparticle formulations. Sonication power amplitude was 30 %, organic to aqueous phase ratio being 5:1, duration of solvent evaporation 15 hours.
